# Supplementary material
Source: PubMed Central journal article supplement (PMC4034165)

## Supplementary Materials

### 1. Supplementary Methods

*Study Population:* We initially compared peripheral blood monocytes (PBMCs) telomere length in 109 community based cases with Parkinson's Disease (PD) fulfilling UK-PD Society brain bank criteria for the diagnosis of PD (Hughes et al., 1992) (mean age 71.41 years, SD = 8.04, 61% male) from the North East of England to an ethnically age and gender matched control group (N = 99, mean age 69.69 years, SD = 7.88, 46% male), with no clinical evidence of PD. All were of Caucasian origin. We subsequently collected mid-brain sections from 45 brains; 28 PD patients (mean age 72.3, SD = 24.3) and 17 age-matched controls (mean age 77.0 SD = 12.0). Mean post mortem delay was 35.7hrs (PD cases = 35.5 compared to controls = 31.2, NS). The *substantia nigra* was micro-dissected from each section before DNA extraction.

*Molecular genetics analysis:* Telomere length was measured as previously described (Cawthon et al., 2003; Martin-Ruiz et al., 2004). Briefly, high molecular weight DNA was isolated from PBMC samples stored at -196 °C and DNA concentration and quality were measured by agarose gel electrophoresis. Telomere length was measured as abundance of telomeric template versus a single gene by quantitative real-time PCR (Martin-Ruiz et al., 2004). Measurements were performed in quadruplicate. Three DNA samples with known telomere lengths (3.0, 5.5 and 9.5kbp) were run as internal standards together with each batch of 7 study samples. The coefficient of variation of the telomere measurement was <3%. MtDNA haplogroups were determined in a previous (Martin-Ruiz et al., 2004).

### 2. Power calculation

Statistical power calculations were carried out using [http://www.dssresearch.com/toolkit/spcalc/power\\_a2.asp](http://www.dssresearch.com/toolkit/spcalc/power_a2.asp)

#### *PBMC telomere length;*

For 109 affected PD patients and 99 healthy controls, the power to detect a 150bp difference in PBMC telomere length between the groups was 99.3% at the 0.05 significance level (assuming a 5% standard deviation in telomere length in each group).

#### *Substantia nigra telomere length;*

For 28 affected PD patients and 17 healthy controls, the power to detect a 400bp difference in *substantia nigra* telomere length between groups was 89.0% at the 0.05 significance level (assuming a 5% standard deviation in telomere length).

## **References**

Cawthon, R.M., Smith, K.R., O'Brien, E., Sivatchenko, A., Kerber, R.A., 2003. Association between telomere length in blood and mortality in people aged 60 years or older. *Lancet* 361, 393-395.

Hughes, A.J., Daniel, S.E., Kilford, L., Lees, A.J., 1992. Accuracy of clinical diagnosis of idiopathic Parkinson's disease: a clinico-pathological study of 100 cases. *J Neurol Neurosurg Psychiatry* 55, 181-184.

Martin-Ruiz, C., Saretzki, G., Petrie, J., Ladhoff, J., Jeyapalan, J., Wei, W., Sedivy, J., von Zglinicki, T., 2004. Stochastic variation in telomere shortening rate causes heterogeneity of human fibroblast replicative life span. *J Biol Chem* 279, 17826-17833.

Torrioni, A., Huoponen, K., Francalacci, P., Petrozzi, M., Morelli, L., Scozzari, R., Obinu, D., Savontaus, M.L., Wallace, D.C., 1996. Classification of European mtDNAs from an analysis of three European populations. *Genetics* 144, 1835-1850.

**Supplementary Fig. 1**

Peripheral blood monocyte telomere lengths in Parkinson's disease patients (PD) and their age-matched spousal controls (Con).

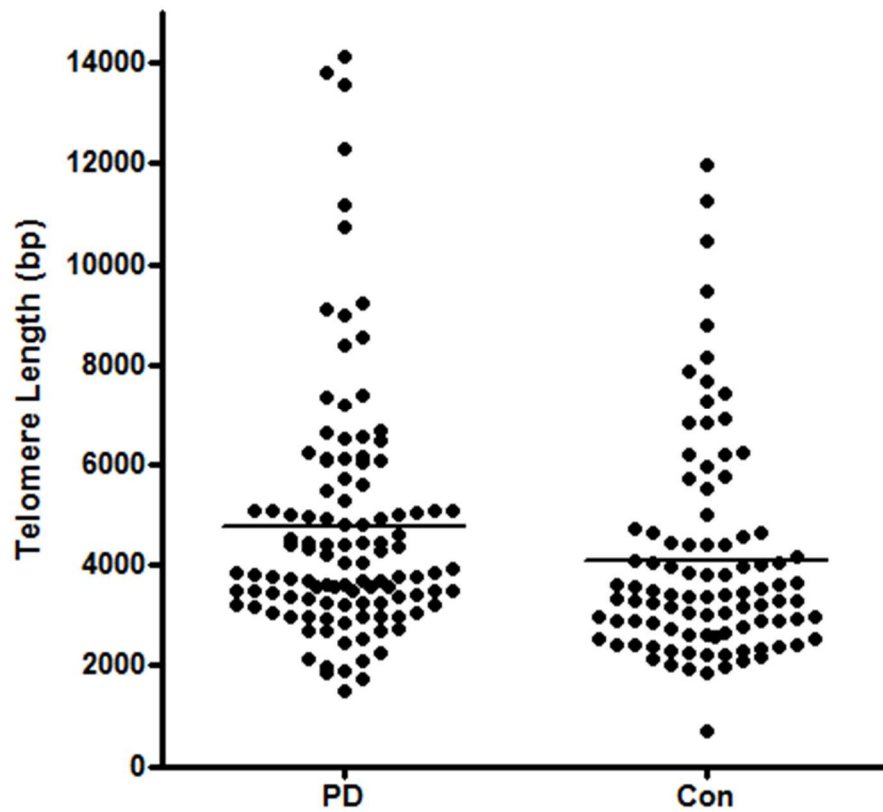

**Supplementary Fig. 2**

Substantia nigra telomere lengths in Parkinson's disease patients (PD) and their age-matched spousal controls (Con).

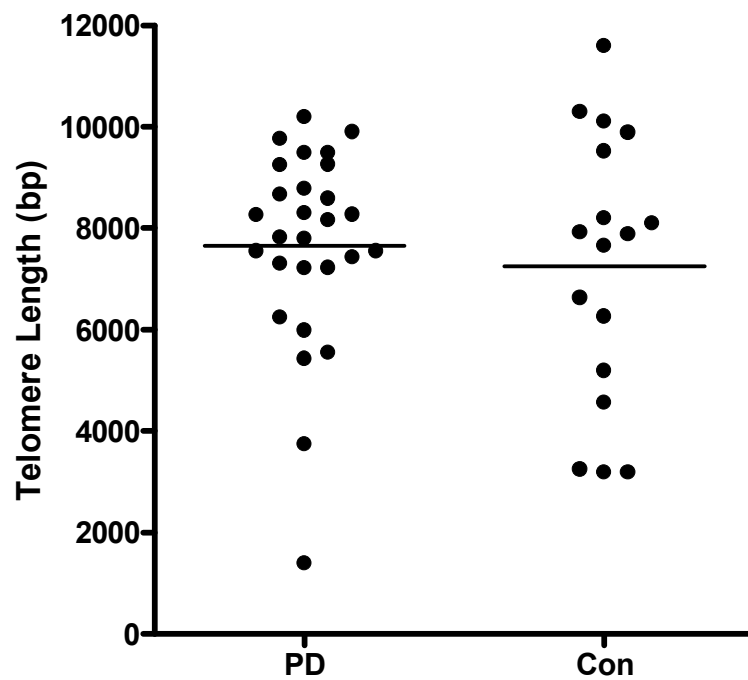

**Supplementary Fig. 3**

Peripheral blood monocyte telomere lengths separated by gender in Parkinson's disease patients (PD) and their age-matched spousal controls (Con) (Where P = 2-sample t-test).

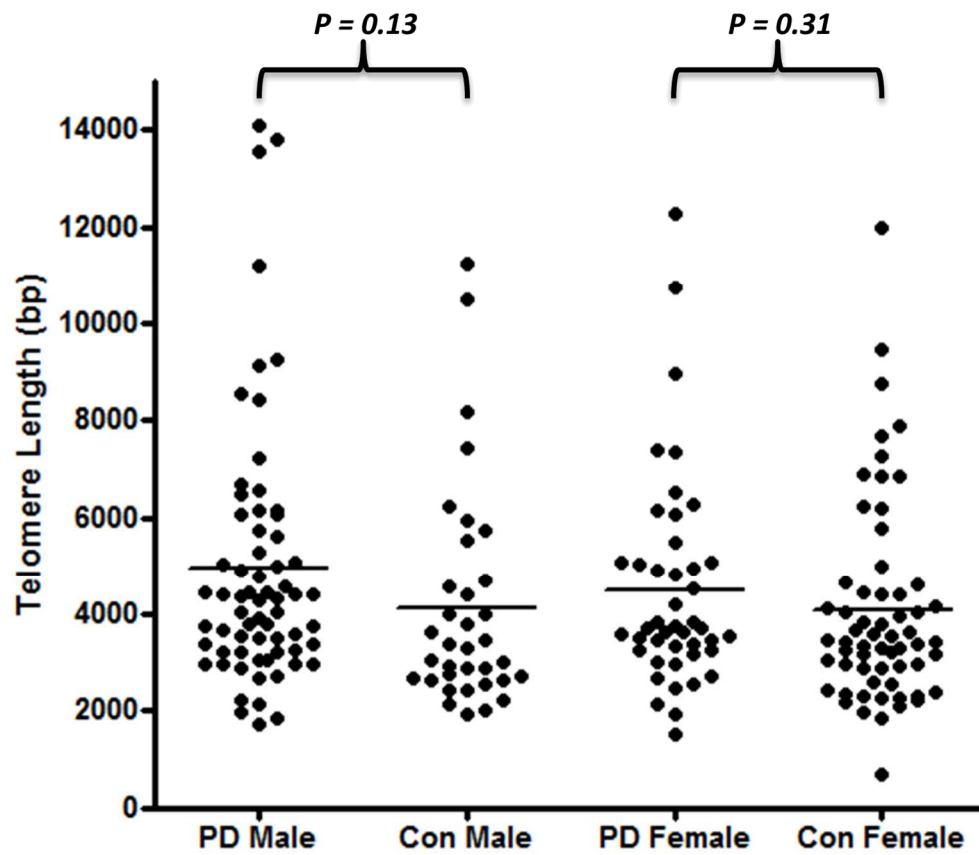

Supplement: NIHMS58509-supplement-01.pdf [file NIHMS58509-supplement-01.pdf]
